# Supplementary material
Source: PubMed Central journal article supplement (PMC3867521)
Supplement: NIHMS511450-supplement-1_si_001.pdf [file NIHMS511450-supplement-1_si_001.pdf]

# Ion channel models based on self-assembling cyclic peptide nanotubes

Javier Montenegro,<sup>†</sup> M. Reza Ghadiri<sup>‡\*</sup> and Juan R. Granja<sup>†\*</sup>

[<sup>†</sup>] *Departamento de Química Orgánica y Unidad Asociada al C.S.I.C., Centro Singular de Investigación en Química Biológica y Materiales Moleculares (CIQUS). Universidad de Santiago de Compostela (USC). Campus Vida. 15782 Santiago de Compostela. Spain*  
[juanr.granja@usc.es](mailto:juanr.granja@usc.es)

[<sup>‡</sup>] *Departments of Chemistry and Molecular Biology, The Scripps Research Institute, 10550 North Torrey Pines Road, La Jolla, California 92037.*  
[ghadiri@scripps.edu](mailto:ghadiri@scripps.edu)

SUPPORTING INFORMATION

**Table 1.** Saturation parameters calculated for the transport of alkaline chlorides in peptide **CP2b** channels in *L*- $\alpha$ -lecithin.

| Electrolyte       | $g_{max}$ (pS) | $K_m$ (mM) <sup>a</sup> |
|-------------------|----------------|-------------------------|
| LiCl              | $2.5 \pm 0.3$  | $3.4 \pm 0.8$           |
| NaCl              | $12.1 \pm 0.2$ | $11.5 \pm 1.8$          |
| KCl               | $21.5 \pm 0.2$ | $7.1 \pm 0.8$           |
| RbCl              | $38.7 \pm 0.3$ | $14.9 \pm 0.7$          |
| CsCl <sup>a</sup> | $41.7 \pm 0.9$ | $20.4 \pm 2.4$          |

<sup>a</sup> Obtained by fitting to a first order Michaelis-menten equation the conductance data observed in the concentration range of 20 mM to 4M KCl. Data points at 2 and 4M were not included in the calculation.

**Table 2.** Conductance, saturation and dynamic parameters for cyclic octapeptide forming channels in 1-monooleoyl-*rac*-glycerol (GMO).

| Channel     | $g_{max}$ (pS) <sup>a</sup> | $K_m$ (mM) <sup>a</sup> | $P_{open}$ (%) <sup>b</sup> | $\tau$ (ms) <sup>b</sup> |
|-------------|-----------------------------|-------------------------|-----------------------------|--------------------------|
| <b>CP2a</b> | $45.8 \pm 2.0$              | $158 \pm 29$            | $52 \pm 6$                  | $728 \pm 13$             |
| <b>CP2b</b> | $43.2 \pm 1.4$              | $59 \pm 10$             | $59 \pm 7$                  | $346 \pm 12$             |
| <b>CP2c</b> | $45.0 \pm 2.3$              | $190 \pm 40$            | $49 \pm 2$                  | $892 \pm 11$             |
| <b>CP2d</b> | $50.3 \pm 1.6$              | $301 \pm 35$            | $35 \pm 2$                  | $577 \pm 8$              |
| <b>CP2e</b> | $49.0 \pm 1.1$              | $282 \pm 22$            | $37 \pm 5$                  | $462 \pm 7$              |

<sup>a</sup> Obtained by fitting to a first order Michaelis-menten equation the conductance data observed in the concentration range of 20 mM to 4M KCl.

<sup>b</sup> Calculated from data analysis of traces containing one single ion channel active in 1M KCl at an applied transmembrane potential of +100mV.
